# Supplementary material for: Luteolin Alleviates Cadmium-Induced Kidney Injury by Inhibiting Oxidative DNA Damage and Repairing Autophagic Flux Blockade in Chickens
Source: MDPI journal article supplement (doi:10.3390/antiox13050525), 2024-04-26
Supplement: s1 [file s1]

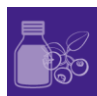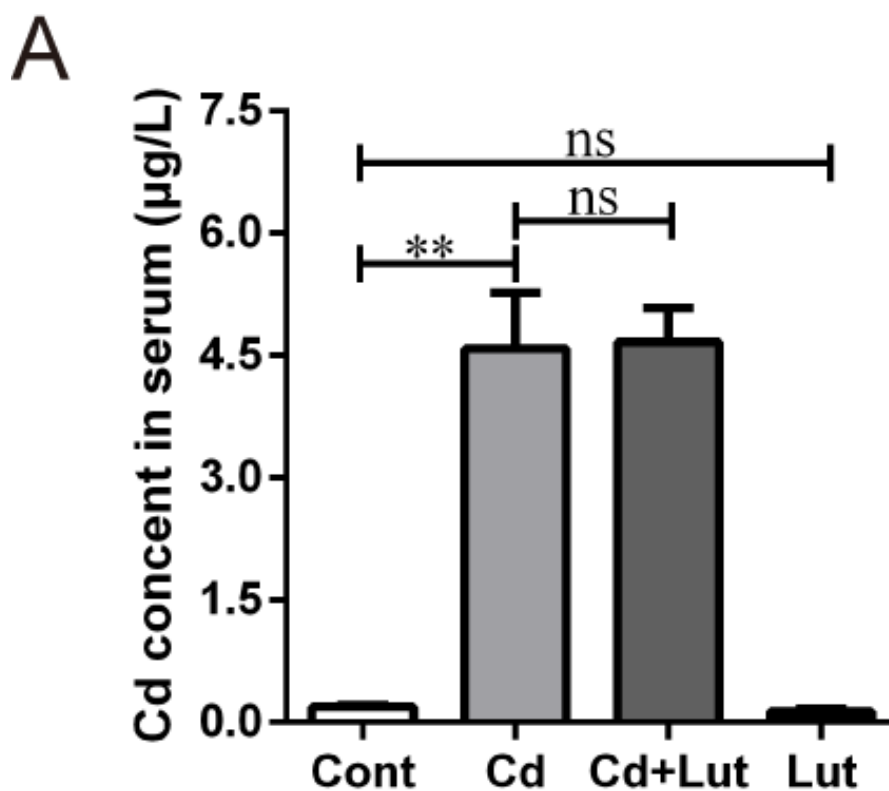

**Supplementary Figure S1.** Effect of Lut and/or Cd on serum Cd content. (A) Detection of serum Cd content by FAAS. Each experiment was duplicated at least three times. (ns:  $P \geq 0.05$ ; \*:  $P < 0.05$ , \*\*:  $p < 0.01$ ).
